# Supplementary material
Source: Springer Nature journal article supplement (https://www.springermedizin.de/resource/supplementary/13014_2010_253_MOESM1_ESM.pdf/9633278)

### Hb

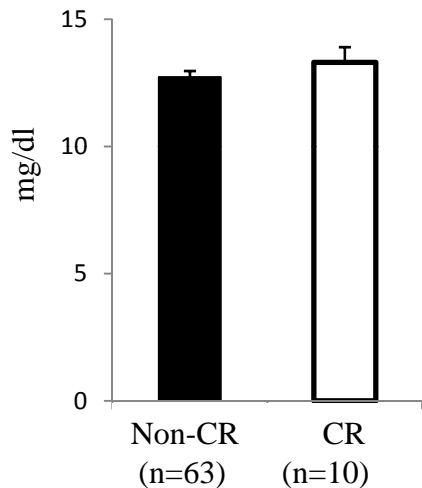

### WBC

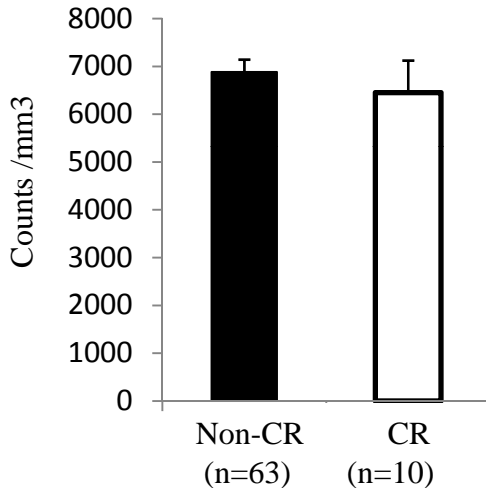

### Platelet

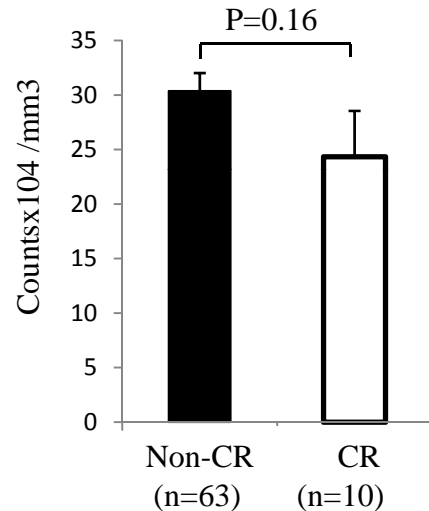

### WBC subpopulation

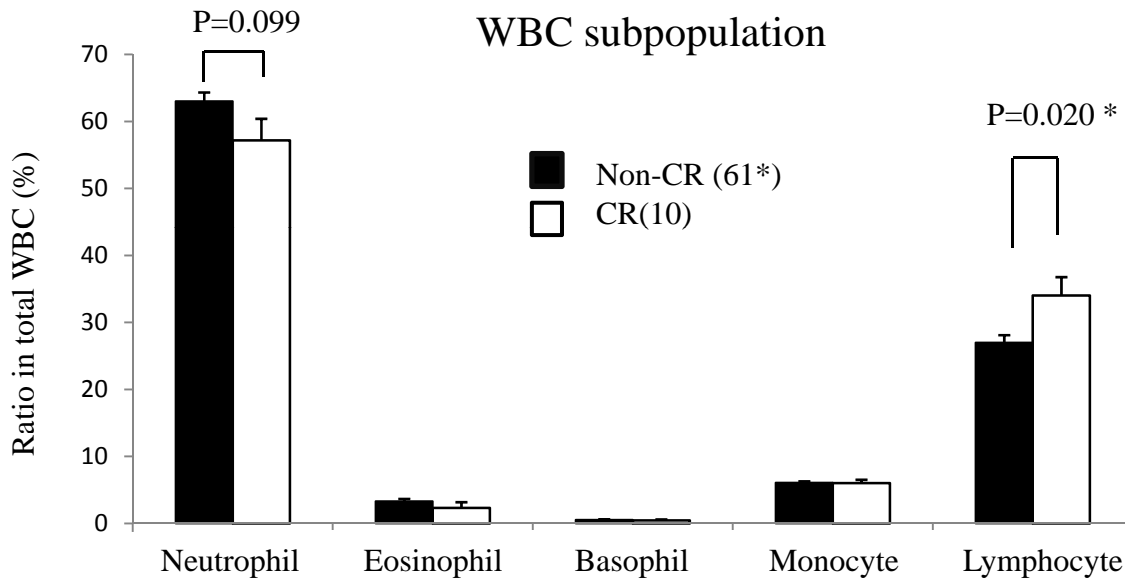

\*: Subtype data are unavailable in 2 cases

Supplement: MOESM1 [file 9633278]
